# Supplementary material
Source: publisher figshare collection journal article supplement (https://springernature.figshare.com/ndownloader/files/22783406)
Supplement: Supplementary file [file 22783406]

上海中医药大学防治新型冠状病毒（2019-nCoV）

应急科研攻关项目

申 请 书

项目名

称： 中医传统功法防控新冠肺炎技术应用研究

---

申 请

者：

房 敏

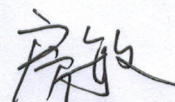

所在单

位：

上海中医药大学针推学院

---

研究期

限：

2020年2月-2020年7月

---

上海中医药大学科技处

2020年2月

Shanghai University of Traditional Chinese Medicine  
Prevents and Controls New Coronavirus (2019-nCoV)

Emergency scientific research project

Application

Project Title: Application of Traditional Chinese Exercise-Dao  
Yin in Prevention and Control of novel coronavirus  
pneumonia

Applicant: Fang Min



Affiliation: Yue yang Integrated Hospital of Traditional  
Chinese and Western Medicine, Shanghai University of  
Traditional Chinese Medicine

Study period: February 2020-July 2020

Department of Science and Technology, Shanghai University  
of Traditional Chinese Medicine

February 2020

# 上海市进一步加快中医药事业发展 三年行动计划（2018年-2020年） 项目建设任务书

项目编号 ZY(2018-2020)-CCCX-2004-02

项目类别 中医药传承创新平台建设

项目名称 推拿生物学效应机制与应用创新研究

项目负责人 房敏

项目承担单位 上海中医药大学附属岳阳中西医结合医院（盖章）

项目起止年月 2018年9月 至 2020年12月

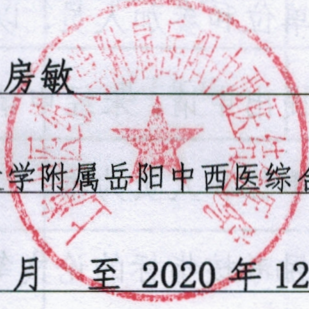

上海市卫生和计划生育委员会

上海市中医药发展办公室

二〇一八年制

**Shanghai Further accelerate the three-year action plan  
for the development of Chinese medicine  
program planning proposal**

**Project Number:**ZY(2018-2020)-CCCX-2004-02

**Project type:** Construction of Chinese Medicine Heritage  
and Innovation Platform

**Project name:** The research of Biological effect mechanism ,  
application and innovation with Tuina intervention

**Project manager:** Min Fang 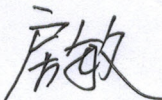

**Project support unit:** Yueyang Hospital of Integrated  
Traditional Chinese and Western Medicine affiliated to  
Shanghai University of Traditional Chinese Medicine

Start and end dates: September 1, 2018 to December 31, 2020

Shanghai Health and Planning Commission Shanghai

Chinese Medicine Development Office

Produced in 2018
